# Supplementary material
Source: publisher figshare collection journal article supplement (https://acs.figshare.com/ndownloader/files/4535044)
Supplement: Supplementary file 1 [file 4535044]

 

#data_New_Global_Publ_Block

data_global

_audit_creation_method            
;
manual editing of the CIF file 
created by SHELXTL Ver. 6.10
and processed with modiCIfer-03272007. 
;

# 1. SUBMISSION DETAILS

_publ_contact_author_name
;
Guzei, Ilia A. 
;
_publ_contact_author_address
;
Department of Chemistry
University of Wisconsin-Madison
1101 University Ave
Madison, WI  53706
USA
;

_publ_contact_author_phone    '608-263-4694'
_publ_contact_author_fax      '608-262-0381'
_publ_contact_author_email    iguzei@chem.wisc.edu

_publ_contact_letter
;
Please consider this CIF submission 
for publication in  
;

_publ_requested_journal      
;
;

_publ_requested_category  FA 
# FA 'Full article' 
# FI 'Full submission - inorganic (Acta C)' 
# FO 'Full submission - organic (Acta C)' 
# FM 'Full submission - metal-organic (Acta C)' 
# CI 'CIF-access paper - inorganic (Acta C)' 
# CO 'CIF-access paper - organic (Acta C)' 
# CM 'CIF-access paper - metal-organic (Acta C)' 

# 2. TITLE AND AUTHOR LIST

_publ_section_title  
;
;


loop_
_publ_author_name
_publ_author_address
'Guzei, Ilia A.'
;
Department of Chemistry
University of Wisconsin-Madison
1101 University Ave
Madison, WI  53706
USA
;
''
;
Department of Chemistry
University of Wisconsin-Madison
1101 University Ave
Madison, WI  53706
USA
;

_publ_section_synopsis
;
;

_publ_section_abstract
;
;

_publ_section_comment
;
;

_publ_section_references
;
Allen, F.H. (2002). <i>Acta Cryst.</i> <b>B58</b>, 380-388.

Bruker-AXS. (2007). APEX2 (Ver. 2.1-4), <i>SADABS</i>, <i>SAINTPLUS</i>,
<i>SHELXTL</i>. Bruker-AXS Inc., Madison, WI, USA.

Bruno, I. J., Cole, J. C.,  Edgington, P. R.,  Kessler, M., 
 Macrae, C. F.,  McCabe, P.,  Pearson, J,  
&  Taylor, R. (2002). <i>Acta Cryst.</i> <b>B58</b>, 389-397.

Cremer D. & Pople J.A.  (1975). <i>J. Am. Chem. Soc.</i> 
<b>97</b>, 1358-1367.

Frisch, M. J., Trucks, G. W.,
Schlegel, H. B., Scuseria, G. E., Robb, M. A., Cheeseman,
J. R., Montgomery, Jr., J. A., Vreven, T., Kudin, K. N., Burant,
J. C., Millam, J. M., Iyengar, S. S., Tomasi, J., Barone, V.,
Mennucci, B. <i>et al.</i> (2004). 
Gaussian 03, Revision C.02,
Gaussian, Inc., Wallingford, CT, USA.

Guzei I.A. (2007).  In-house Crystallographic Programs: FCF_filter,INSerter,
modiCIFer.
Molecular Structure Laboratory, University of Wisconsin-Madison,
Madison, WI, USA.

Sheldrick, G.M. (2008). Acta Cryst. <b>A64</b>, 112-122.
;

_publ_section_acknowledgements
;
We thank the National Science Foundation for financial support. 

The manuscript was prepared with the beta test version 1.0.2. 
of program <i>publCIF</i> to be released by the IUCr and Ilia A. Guzei's
program <i>modiCIFer</i>.
;

_publ_section_figure_captions
;
Figure 1.  Molecular structure of (I).  The thermal ellipsoids are 
shown at 50% probability level.
;

_publ_section_exptl_prep
;
;


_publ_section_exptl_refinement
;
All H-atoms were placed in idealized locations and 
refined as riding with appropriate thermal displacement
coefficients U~iso~(H) = 1.2 or 1.5 times U~eq~(bearing atom). 
;

#3. data 
data_yoon14 
  
_chemical_name_systematic 
; 
 ? 
; 
_chemical_name_common             ? 
_chemical_melting_point           ? 
_chemical_formula_moiety          'C28 H28 N2 O5 S' 
_chemical_formula_sum             'C28 H28 N2 O5 S' 
_chemical_formula_weight          504.58 
  
loop_ 
 _atom_type_symbol 
 _atom_type_description 
 _atom_type_scat_dispersion_real 
 _atom_type_scat_dispersion_imag 
 _atom_type_scat_source 
 'C'  'C'   0.0181   0.0091 
 'International Tables Vol C Tables 4.2.6.8 and 6.1.1.4' 
 'H'  'H'   0.0000   0.0000 
 'International Tables Vol C Tables 4.2.6.8 and 6.1.1.4' 
 'N'  'N'   0.0311   0.0180 
 'International Tables Vol C Tables 4.2.6.8 and 6.1.1.4' 
 'O'  'O'   0.0492   0.0322 
 'International Tables Vol C Tables 4.2.6.8 and 6.1.1.4' 
 'S'  'S'   0.3331   0.5567 
 'International Tables Vol C Tables 4.2.6.8 and 6.1.1.4' 
  
_symmetry_cell_setting            Orthorhombic 
_symmetry_space_group_name_H-M    'P c c n     '
_symmetry_space_group_name_Hall   '-P 2ab 2ac  '
_symmetry_int_tables_number       56
  
loop_ 
 _symmetry_equiv_pos_as_xyz 
 'x, y, z' 
 '-x+1/2, -y+1/2, z' 
 'x+1/2, -y, -z+1/2' 
 '-x, y+1/2, -z+1/2' 
 '-x, -y, -z' 
 'x-1/2, y-1/2, -z' 
 '-x-1/2, y, z-1/2' 
 'x, -y-1/2, z-1/2' 
  
_cell_length_a                    22.916(6) 
_cell_length_b                    27.217(9) 
_cell_length_c                    7.899(2) 
_cell_angle_alpha                 90.00 
_cell_angle_beta                  90.00 
_cell_angle_gamma                 90.00 
_cell_volume                      4927(2) 
_cell_formula_units_Z             8 
_cell_measurement_temperature     103(2) 
_cell_measurement_reflns_used     9996 
_cell_measurement_theta_min       2.5205
_cell_measurement_theta_max       58.1439
  
_exptl_crystal_description        needle
_exptl_crystal_colour             colourless
_exptl_crystal_size_max           0.30 
_exptl_crystal_size_mid           0.08 
_exptl_crystal_size_min           0.08 
_exptl_crystal_density_meas       ?
_exptl_crystal_density_diffrn     1.361 
_exptl_crystal_density_method     'not measured'
_exptl_crystal_F_000              2128 
_exptl_absorpt_coefficient_mu     1.522 
_exptl_absorpt_correction_type    'multi-scan'
_exptl_absorpt_process_details
;
SADABS  (Bruker-AXS, 2007)
;
_exptl_absorpt_correction_T_min   0.6581 
_exptl_absorpt_correction_T_max   0.8879 
  
_exptl_special_details 
; 
 ? 
; 
  
_diffrn_ambient_temperature       103.0(1) 
_diffrn_radiation_wavelength      1.54184 
_diffrn_radiation_type            Cu-K\a
_diffrn_radiation_source          'fine-focus sealed tube' 
_diffrn_radiation_monochromator   graphite 
_diffrn_measurement_device_type   'Bruker SMART APEX2 area detector' 
_diffrn_measurement_method        '0.62\% \w and 0.62 \% \f scans'
_diffrn_detector_area_resol_mean  ? 
_diffrn_reflns_number             52934 
_diffrn_reflns_av_R_equivalents   0.0317 
_diffrn_reflns_av_sigmaI/netI     0.0146 
_diffrn_reflns_limit_h_min        -27 
_diffrn_reflns_limit_h_max        27 
_diffrn_reflns_limit_k_min        -31 
_diffrn_reflns_limit_k_max        33 
_diffrn_reflns_limit_l_min        -8 
_diffrn_reflns_limit_l_max        9 
_diffrn_reflns_theta_min          2.52 
_diffrn_reflns_theta_max          69.71 
_reflns_number_total              4630 
_reflns_number_gt                 4092 
_reflns_threshold_expression      I>2\s(I) 
  
_computing_data_collection        'APEX2 Ver. 2.1-4 (Bruker-AXS, 2007)'
_computing_cell_refinement        'SAINT Ver. 7.24A (Bruker-AXS, 2007)'
_computing_data_reduction         'SAINT Ver. 7.24A'
_computing_structure_solution     'SHELXTL (Sheldrick, 2008)'
_computing_structure_refinement   'SHELXTL'
_computing_molecular_graphics     'SHELXTL'
_computing_publication_material   'SHELXTL' 
  
_refine_special_details 
; 
 Refinement of F^2^ against ALL reflections.  The weighted R-factor wR and 
 goodness of fit S are based on F^2^, conventional R-factors R are based 
 on F, with F set to zero for negative F^2^. The threshold expression of 
 F^2^ > 2sigma(F^2^) is used only for calculating R-factors(gt) etc. and is 
 not relevant to the choice of reflections for refinement.  R-factors based 
 on F^2^ are statistically about twice as large as those based on F, and R- 
 factors based on ALL data will be even larger. 
; 
  
_refine_ls_structure_factor_coef  Fsqd 
_refine_ls_matrix_type            full 
_refine_ls_weighting_scheme       calc 
_refine_ls_weighting_details 
 'calc w=1/[\s^2^(Fo^2^)+(0.0460P)^2^+2.9457P] where P=(Fo^2^+2Fc^2^)/3' 
_atom_sites_solution_primary      direct 
_atom_sites_solution_secondary    difmap 
_atom_sites_solution_hydrogens    geom 
_refine_ls_hydrogen_treatment     refall
_refine_ls_extinction_method      none 
_refine_ls_extinction_coef        ? 
_refine_ls_number_reflns          4630 
_refine_ls_number_parameters      350 
_refine_ls_number_restraints      0 
_refine_ls_R_factor_all           0.0401 
_refine_ls_R_factor_gt            0.0346 
_refine_ls_wR_factor_ref          0.0904 
_refine_ls_wR_factor_gt           0.0870 
_refine_ls_goodness_of_fit_ref    1.034 
_refine_ls_restrained_S_all       1.034 
_refine_ls_shift/su_max           0.000 
_refine_ls_shift/su_mean          0.000 
  
loop_ 
 _atom_site_label 
 _atom_site_type_symbol 
 _atom_site_fract_x 
 _atom_site_fract_y 
 _atom_site_fract_z 
 _atom_site_U_iso_or_equiv 
 _atom_site_adp_type 
 _atom_site_occupancy 
 _atom_site_symmetry_multiplicity 
 _atom_site_calc_flag 
 _atom_site_refinement_flags 
 _atom_site_disorder_assembly 
 _atom_site_disorder_group 
S1 S -0.084518(16) 0.177179(13) 0.92179(5) 0.01857(11) Uani 1 1 d . . . 
O1 O 0.01798(6) -0.01799(5) 1.33043(18) 0.0398(3) Uani 1 1 d . . . 
O2 O 0.09328(5) -0.00045(5) 1.17936(17) 0.0357(3) Uani 1 1 d . . . 
O3 O -0.13166(5) 0.18566(4) 1.03717(14) 0.0279(3) Uani 1 1 d . . . 
O4 O -0.03859(5) 0.21247(4) 0.90542(15) 0.0270(3) Uani 1 1 d . . . 
O5 O -0.16897(5) 0.14309(4) 0.52153(14) 0.0267(3) Uani 1 1 d . . . 
N1 N 0.04253(6) 0.00590(5) 1.22040(17) 0.0239(3) Uani 1 1 d . . . 
N2 N -0.11186(5) 0.16895(4) 0.73750(15) 0.0180(3) Uani 1 1 d . . . 
C1 C 0.00935(7) 0.04541(5) 1.1362(2) 0.0208(3) Uani 1 1 d . . . 
C2 C 0.03719(7) 0.07326(6) 1.0144(2) 0.0231(3) Uani 1 1 d . . . 
H2 H 0.0759(8) 0.06578(16) 0.9803(7) 0.028 Uiso 1 1 calc R . . 
C3 C 0.00733(7) 0.11235(6) 0.9433(2) 0.0225(3) Uani 1 1 d . . . 
H3 H 0.0254(4) 0.1321(4) 0.8611(17) 0.027 Uiso 1 1 calc R . . 
C4 C -0.04960(6) 0.12217(5) 0.99406(19) 0.0188(3) Uani 1 1 d . . . 
C5 C -0.07736(7) 0.09271(6) 1.1122(2) 0.0239(3) Uani 1 1 d . . . 
H5 H -0.1174(8) 0.09922(14) 1.1436(7) 0.029 Uiso 1 1 calc R . . 
C6 C -0.04739(7) 0.05378(6) 1.1854(2) 0.0256(3) Uani 1 1 d . . . 
H6 H -0.0649(4) 0.0342(4) 1.2642(18) 0.031 Uiso 1 1 calc R . . 
C7 C -0.17284(6) 0.15162(6) 0.6990(2) 0.0210(3) Uani 1 1 d . . . 
C8 C -0.18813(8) 0.10360(6) 0.7832(3) 0.0338(4) Uani 1 1 d . . . 
H8B H -0.2256(5) 0.0917(3) 0.7391(12) 0.041 Uiso 1 1 calc R . . 
H8C H -0.1912(5) 0.10855(12) 0.9060(14) 0.041 Uiso 1 1 d R . . 
H8A H -0.1576(4) 0.0793(3) 0.7593(13) 0.041 Uiso 1 1 d R . . 
C9 C -0.21722(7) 0.19189(6) 0.7356(2) 0.0274(4) Uani 1 1 d . . . 
H9A H -0.2055(3) 0.2220(4) 0.6785(14) 0.033 Uiso 1 1 calc R . . 
H9C H -0.2191(4) 0.1977(3) 0.8570(14) 0.033 Uiso 1 1 d R . . 
H9B H -0.2554(5) 0.1817(2) 0.6946(13) 0.033 Uiso 1 1 d R . . 
C10 C -0.13004(7) 0.17932(6) 0.4550(2) 0.0283(4) Uani 1 1 d . . . 
H10B H -0.1492(3) 0.2125(5) 0.4514(2) 0.034 Uiso 1 1 calc R . . 
H10A H -0.1169(2) 0.17029(13) 0.3376(17) 0.034 Uiso 1 1 calc R . . 
C11 C -0.07887(7) 0.17907(6) 0.5785(2) 0.0223(3) Uani 1 1 d . . . 
H11 H -0.0599(4) 0.2120(6) 0.5833(2) 0.027 Uiso 1 1 calc R . . 
C12 C -0.03484(7) 0.13990(6) 0.54270(19) 0.0213(3) Uani 1 1 d . . . 
H12 H -0.0486(3) 0.1046(6) 0.5409(2) 0.026 Uiso 1 1 calc R . . 
C13 C 0.02123(7) 0.14870(6) 0.5131(2) 0.0209(3) Uani 1 1 d . . . 
H13 H 0.0338(3) 0.1819(7) 0.5077(2) 0.025 Uiso 1 1 calc R . . 
C14 C 0.06482(6) 0.10984(6) 0.4882(2) 0.0207(3) Uani 1 1 d . . . 
H14 H 0.0493(3) 0.0766(6) 0.5000(3) 0.025 Uiso 1 1 calc R . . 
C15 C 0.11739(6) 0.11350(5) 0.3728(2) 0.0194(3) Uani 1 1 d . . . 
H15 H 0.1291(2) 0.0814(6) 0.3261(9) 0.023 Uiso 1 1 calc R . . 
C16 C 0.12629(6) 0.11658(6) 0.5621(2) 0.0205(3) Uani 1 1 d . . . 
H16 H 0.13421(17) 0.1489(6) 0.6032(8) 0.025 Uiso 1 1 calc R . . 
C17 C 0.13134(6) 0.15505(5) 0.25598(19) 0.0190(3) Uani 1 1 d . . . 
C18 C 0.08916(7) 0.18305(6) 0.1741(2) 0.0238(3) Uani 1 1 d . . . 
H18 H 0.0500(8) 0.17898(10) 0.2021(6) 0.029 Uiso 1 1 calc R . . 
C19 C 0.10484(7) 0.21712(6) 0.0506(2) 0.0275(4) Uani 1 1 d . . . 
H19 H 0.0750(6) 0.2361(4) -0.0065(12) 0.033 Uiso 1 1 calc R . . 
C20 C 0.16297(7) 0.22397(6) 0.0092(2) 0.0274(4) Uani 1 1 d . . . 
H20 H 0.1730(3) 0.2457(5) -0.0708(19) 0.033 Uiso 1 1 calc R . . 
C21 C 0.20551(7) 0.19693(6) 0.0926(2) 0.0257(3) Uani 1 1 d . . . 
H21 H 0.2456(9) 0.20182(12) 0.0657(6) 0.031 Uiso 1 1 calc R . . 
C22 C 0.18994(7) 0.16289(5) 0.2147(2) 0.0206(3) Uani 1 1 d . . . 
H22 H 0.2198(6) 0.1444(4) 0.2719(11) 0.025 Uiso 1 1 calc R . . 
C23 C 0.15423(6) 0.07654(6) 0.6614(2) 0.0206(3) Uani 1 1 d . . . 
C24 C 0.17738(6) 0.08721(6) 0.8204(2) 0.0244(3) Uani 1 1 d . . . 
H24 H 0.17523(8) 0.1206(7) 0.8637(9) 0.029 Uiso 1 1 calc R . . 
C25 C 0.20352(7) 0.05083(7) 0.9179(2) 0.0298(4) Uani 1 1 d . . . 
H25 H 0.2196(4) 0.05890(19) 1.029(2) 0.036 Uiso 1 1 calc R . . 
C26 C 0.20665(7) 0.00306(7) 0.8576(2) 0.0299(4) Uani 1 1 d . . . 
H26 H 0.2236(4) -0.0205(6) 0.9204(15) 0.036 Uiso 1 1 calc R . . 
C27 C 0.18359(7) -0.00813(6) 0.7002(2) 0.0260(4) Uani 1 1 d . . . 
H27 H 0.18582(8) -0.0406(7) 0.6588(9) 0.031 Uiso 1 1 calc R . . 
C28 C 0.15723(7) 0.02804(6) 0.6029(2) 0.0233(3) Uani 1 1 d . . . 
H28 H 0.1407(3) 0.01964(18) 0.493(2) 0.028 Uiso 1 1 calc R . . 
  
loop_ 
 _atom_site_aniso_label 
 _atom_site_aniso_U_11 
 _atom_site_aniso_U_22 
 _atom_site_aniso_U_33 
 _atom_site_aniso_U_23 
 _atom_site_aniso_U_13 
 _atom_site_aniso_U_12 
S1 0.02196(19) 0.01759(18) 0.01616(19) -0.00209(13) -0.00241(14) 0.00448(13) 
O1 0.0445(7) 0.0310(6) 0.0440(8) 0.0193(6) -0.0032(6) 0.0004(6) 
O2 0.0338(7) 0.0349(7) 0.0383(7) 0.0058(6) -0.0027(6) 0.0143(5) 
O3 0.0339(6) 0.0326(6) 0.0171(6) -0.0019(5) 0.0017(5) 0.0141(5) 
O4 0.0291(6) 0.0183(5) 0.0336(6) -0.0017(5) -0.0097(5) -0.0002(4) 
O5 0.0283(6) 0.0294(6) 0.0225(6) -0.0050(5) -0.0069(5) 0.0039(5) 
N1 0.0328(8) 0.0162(6) 0.0228(7) -0.0024(5) -0.0104(6) 0.0006(5) 
N2 0.0169(6) 0.0217(6) 0.0155(6) 0.0015(5) 0.0015(5) 0.0020(5) 
C1 0.0273(8) 0.0156(7) 0.0196(8) -0.0024(6) -0.0080(6) 0.0002(6) 
C2 0.0224(8) 0.0253(8) 0.0218(8) -0.0011(6) -0.0017(6) 0.0047(6) 
C3 0.0245(8) 0.0249(8) 0.0180(8) 0.0015(6) -0.0012(6) 0.0013(6) 
C4 0.0219(7) 0.0185(7) 0.0161(7) -0.0025(6) -0.0057(6) 0.0023(6) 
C5 0.0218(8) 0.0254(8) 0.0244(8) 0.0017(7) -0.0006(6) 0.0012(6) 
C6 0.0267(8) 0.0246(8) 0.0253(8) 0.0054(7) -0.0017(7) -0.0035(6) 
C7 0.0188(7) 0.0232(7) 0.0210(8) 0.0006(6) -0.0033(6) 0.0004(6) 
C8 0.0285(9) 0.0270(9) 0.0459(11) 0.0080(8) -0.0067(8) -0.0065(7) 
C9 0.0196(8) 0.0343(9) 0.0282(9) 0.0020(7) -0.0004(6) 0.0065(7) 
C10 0.0307(9) 0.0347(9) 0.0196(8) 0.0030(7) 0.0005(7) 0.0111(7) 
C11 0.0268(8) 0.0228(8) 0.0173(8) 0.0037(6) 0.0045(6) 0.0020(6) 
C12 0.0250(8) 0.0206(7) 0.0182(8) 0.0030(6) 0.0000(6) 0.0021(6) 
C13 0.0251(8) 0.0193(7) 0.0183(8) 0.0014(6) 0.0008(6) 0.0005(6) 
C14 0.0205(7) 0.0200(7) 0.0216(8) 0.0030(6) 0.0007(6) -0.0004(6) 
C15 0.0182(7) 0.0194(7) 0.0207(8) 0.0001(6) -0.0005(6) 0.0004(6) 
C16 0.0196(7) 0.0208(7) 0.0210(8) 0.0005(6) 0.0006(6) -0.0012(6) 
C17 0.0205(7) 0.0189(7) 0.0177(7) -0.0020(6) -0.0010(6) -0.0017(6) 
C18 0.0201(7) 0.0237(8) 0.0277(9) 0.0017(7) -0.0006(6) -0.0008(6) 
C19 0.0306(9) 0.0225(8) 0.0295(9) 0.0040(7) -0.0061(7) 0.0006(7) 
C20 0.0378(9) 0.0204(7) 0.0239(9) 0.0039(7) 0.0010(7) -0.0062(7) 
C21 0.0242(8) 0.0252(8) 0.0278(9) -0.0012(7) 0.0038(7) -0.0067(6) 
C22 0.0204(7) 0.0209(7) 0.0205(8) -0.0020(6) -0.0012(6) -0.0001(6) 
C23 0.0141(7) 0.0259(7) 0.0219(8) 0.0041(6) 0.0033(6) -0.0014(6) 
C24 0.0179(7) 0.0296(8) 0.0257(8) 0.0008(7) -0.0003(6) -0.0022(6) 
C25 0.0210(8) 0.0423(10) 0.0261(9) 0.0042(8) -0.0051(7) 0.0008(7) 
C26 0.0215(8) 0.0355(9) 0.0328(10) 0.0124(8) -0.0013(7) 0.0038(7) 
C27 0.0209(8) 0.0250(8) 0.0319(9) 0.0067(7) 0.0032(7) 0.0003(6) 
C28 0.0197(7) 0.0259(8) 0.0242(8) 0.0041(6) 0.0001(6) -0.0021(6) 
  
_geom_special_details 
; 
 All esds (except the esd in the dihedral angle between two l.s. planes) 
 are estimated using the full covariance matrix.  The cell esds are taken 
 into account individually in the estimation of esds in distances, angles 
 and torsion angles; correlations between esds in cell parameters are only 
 used when they are defined by crystal symmetry.  An approximate (isotropic) 
 treatment of cell esds is used for estimating esds involving l.s. planes. 
; 
  
loop_ 
 _geom_bond_atom_site_label_1 
 _geom_bond_atom_site_label_2 
 _geom_bond_distance 
 _geom_bond_site_symmetry_2 
 _geom_bond_publ_flag 
S1 O4 1.4308(12) . yes
S1 O3 1.4320(12) . yes
S1 N2 1.6005(13) . yes
S1 C4 1.7911(15) . yes
O1 N1 1.2225(19) . yes
O2 N1 1.2196(18) . yes
O5 C7 1.424(2) . yes
O5 C10 1.430(2) . yes
N1 C1 1.4754(19) . yes
N2 C11 1.4912(19) . yes
N2 C7 1.5059(19) . yes
C1 C6 1.376(2) . ? 
C1 C2 1.381(2) . ? 
C2 C3 1.384(2) . ? 
C2 H2 0.9492 . ? 
C3 C4 1.391(2) . ? 
C3 H3 0.9402 . ? 
C4 C5 1.385(2) . ? 
C5 C6 1.389(2) . ? 
C5 H5 0.9673 . ? 
C6 H6 0.9120 . ? 
C7 C8 1.507(2) . ? 
C7 C9 1.523(2) . ? 
C8 H8B 0.9819 . ? 
C8 H8C 0.9819 . ? 
C8 H8A 0.9822 . ? 
C9 H9A 0.9731 . ? 
C9 H9C 0.9730 . ? 
C9 H9B 0.9731 . ? 
C10 C11 1.526(2) . ? 
C10 H10B 1.0057 . ? 
C10 H10A 1.0057 . ? 
C11 C12 1.495(2) . ? 
C11 H11 0.9975 . ? 
C12 C13 1.328(2) . ? 
C12 H12 1.0101 . ? 
C13 C14 1.468(2) . ? 
C13 H13 0.9500 . ? 
C14 C15 1.514(2) . ? 
C14 C16 1.536(2) . ? 
C14 H14 0.9777 . ? 
C15 C17 1.494(2) . ? 
C15 C16 1.511(2) . ? 
C15 H15 0.9864 . ? 
C16 C23 1.488(2) . ? 
C16 H16 0.9554 . ? 
C17 C18 1.391(2) . ? 
C17 C22 1.398(2) . ? 
C18 C19 1.393(2) . ? 
C18 H18 0.9306 . ? 
C19 C20 1.384(2) . ? 
C19 H19 0.9683 . ? 
C20 C21 1.388(2) . ? 
C20 H20 0.8952 . ? 
C21 C22 1.384(2) . ? 
C21 H21 0.9524 . ? 
C22 H22 0.9618 . ? 
C23 C24 1.394(2) . ? 
C23 C28 1.400(2) . ? 
C24 C25 1.390(2) . ? 
C24 H24 0.9727 . ? 
C25 C26 1.387(3) . ? 
C25 H25 0.9748 . ? 
C26 C27 1.385(3) . ? 
C26 H26 0.8995 . ? 
C27 C28 1.388(2) . ? 
C27 H27 0.9431 . ? 
C28 H28 0.9743 . ? 
  
loop_ 
 _geom_angle_atom_site_label_1 
 _geom_angle_atom_site_label_2 
 _geom_angle_atom_site_label_3 
 _geom_angle 
 _geom_angle_site_symmetry_1 
 _geom_angle_site_symmetry_3 
 _geom_angle_publ_flag 
O4 S1 O3 120.28(7) . . yes
O4 S1 N2 107.44(7) . . yes
O3 S1 N2 107.82(7) . . yes
O4 S1 C4 105.14(7) . . yes
O3 S1 C4 105.60(7) . . yes
N2 S1 C4 110.36(7) . . yes
C7 O5 C10 106.76(12) . . yes
O2 N1 O1 123.52(14) . . yes
O2 N1 C1 118.34(13) . . yes
O1 N1 C1 118.11(14) . . yes
C11 N2 C7 111.00(12) . . yes
C11 N2 S1 122.79(10) . . yes
C7 N2 S1 126.20(10) . . yes
C6 C1 C2 122.86(14) . . ? 
C6 C1 N1 118.69(14) . . ? 
C2 C1 N1 118.43(14) . . ? 
C1 C2 C3 118.44(15) . . ? 
C1 C2 H2 120.8 . . ? 
C3 C2 H2 120.8 . . ? 
C2 C3 C4 119.63(15) . . ? 
C2 C3 H3 120.2 . . ? 
C4 C3 H3 120.2 . . ? 
C5 C4 C3 120.93(14) . . ? 
C5 C4 S1 119.56(12) . . ? 
C3 C4 S1 119.20(12) . . ? 
C4 C5 C6 119.66(15) . . ? 
C4 C5 H5 120.2 . . ? 
C6 C5 H5 120.2 . . ? 
C1 C6 C5 118.43(15) . . ? 
C1 C6 H6 120.8 . . ? 
C5 C6 H6 120.8 . . ? 
O5 C7 N2 101.07(12) . . ? 
O5 C7 C8 107.90(13) . . ? 
N2 C7 C8 113.47(13) . . ? 
O5 C7 C9 110.23(12) . . ? 
N2 C7 C9 110.86(12) . . ? 
C8 C7 C9 112.65(14) . . ? 
C7 C8 H8B 109.5 . . ? 
C7 C8 H8C 109.5 . . ? 
H8B C8 H8C 109.5 . . ? 
C7 C8 H8A 109.5 . . ? 
H8B C8 H8A 109.4 . . ? 
H8C C8 H8A 109.5 . . ? 
C7 C9 H9A 109.5 . . ? 
C7 C9 H9C 109.5 . . ? 
H9A C9 H9C 109.5 . . ? 
C7 C9 H9B 109.5 . . ? 
H9A C9 H9B 109.5 . . ? 
H9C C9 H9B 109.5 . . ? 
O5 C10 C11 103.96(13) . . ? 
O5 C10 H10B 111.0 . . ? 
C11 C10 H10B 111.0 . . ? 
O5 C10 H10A 111.0 . . ? 
C11 C10 H10A 111.0 . . ? 
H10B C10 H10A 109.0 . . ? 
N2 C11 C12 111.71(12) . . ? 
N2 C11 C10 98.62(12) . . ? 
C12 C11 C10 113.63(13) . . ? 
N2 C11 H11 110.8 . . ? 
C12 C11 H11 110.8 . . ? 
C10 C11 H11 110.8 . . ? 
C13 C12 C11 123.90(14) . . ? 
C13 C12 H12 118.1 . . ? 
C11 C12 H12 118.1 . . ? 
C12 C13 C14 123.50(14) . . ? 
C12 C13 H13 118.2 . . ? 
C14 C13 H13 118.2 . . ? 
C13 C14 C15 125.07(13) . . ? 
C13 C14 C16 119.16(13) . . ? 
C15 C14 C16 59.39(10) . . ? 
C13 C14 H14 114.1 . . ? 
C15 C14 H14 114.1 . . ? 
C16 C14 H14 114.1 . . ? 
C17 C15 C16 122.70(13) . . ? 
C17 C15 C14 126.29(13) . . ? 
C16 C15 C14 61.02(10) . . ? 
C17 C15 H15 112.5 . . ? 
C16 C15 H15 112.5 . . ? 
C14 C15 H15 112.5 . . ? 
C23 C16 C15 122.65(14) . . ? 
C23 C16 C14 120.51(13) . . ? 
C15 C16 C14 59.59(10) . . ? 
C23 C16 H16 114.4 . . ? 
C15 C16 H16 114.4 . . ? 
C14 C16 H16 114.4 . . ? 
C18 C17 C22 118.38(14) . . ? 
C18 C17 C15 123.61(14) . . ? 
C22 C17 C15 117.71(13) . . ? 
C17 C18 C19 120.76(15) . . ? 
C17 C18 H18 119.6 . . ? 
C19 C18 H18 119.6 . . ? 
C20 C19 C18 120.21(15) . . ? 
C20 C19 H19 119.9 . . ? 
C18 C19 H19 119.9 . . ? 
C19 C20 C21 119.50(15) . . ? 
C19 C20 H20 120.3 . . ? 
C21 C20 H20 120.3 . . ? 
C22 C21 C20 120.31(15) . . ? 
C22 C21 H21 119.8 . . ? 
C20 C21 H21 119.8 . . ? 
C21 C22 C17 120.81(15) . . ? 
C21 C22 H22 119.6 . . ? 
C17 C22 H22 119.6 . . ? 
C24 C23 C28 118.39(14) . . ? 
C24 C23 C16 119.11(14) . . ? 
C28 C23 C16 122.49(14) . . ? 
C25 C24 C23 120.98(16) . . ? 
C25 C24 H24 119.5 . . ? 
C23 C24 H24 119.5 . . ? 
C26 C25 C24 120.00(17) . . ? 
C26 C25 H25 120.0 . . ? 
C24 C25 H25 120.0 . . ? 
C27 C26 C25 119.66(16) . . ? 
C27 C26 H26 120.2 . . ? 
C25 C26 H26 120.2 . . ? 
C26 C27 C28 120.49(16) . . ? 
C26 C27 H27 119.8 . . ? 
C28 C27 H27 119.8 . . ? 
C27 C28 C23 120.48(16) . . ? 
C27 C28 H28 119.8 . . ? 
C23 C28 H28 119.8 . . ? 
  
loop_ 
 _geom_torsion_atom_site_label_1 
 _geom_torsion_atom_site_label_2 
 _geom_torsion_atom_site_label_3 
 _geom_torsion_atom_site_label_4 
 _geom_torsion 
 _geom_torsion_site_symmetry_1 
 _geom_torsion_site_symmetry_2 
 _geom_torsion_site_symmetry_3 
 _geom_torsion_site_symmetry_4 
 _geom_torsion_publ_flag 
O4 S1 N2 C11 23.55(13) . . . . ? 
O3 S1 N2 C11 154.56(11) . . . . ? 
C4 S1 N2 C11 -90.57(12) . . . . ? 
O4 S1 N2 C7 -155.01(11) . . . . ? 
O3 S1 N2 C7 -24.00(14) . . . . ? 
C4 S1 N2 C7 90.88(13) . . . . ? 
O2 N1 C1 C6 -178.06(14) . . . . ? 
O1 N1 C1 C6 0.3(2) . . . . ? 
O2 N1 C1 C2 0.2(2) . . . . ? 
O1 N1 C1 C2 178.59(14) . . . . ? 
C6 C1 C2 C3 2.3(2) . . . . ? 
N1 C1 C2 C3 -175.85(13) . . . . ? 
C1 C2 C3 C4 -0.8(2) . . . . ? 
C2 C3 C4 C5 -1.5(2) . . . . ? 
C2 C3 C4 S1 172.11(12) . . . . ? 
O4 S1 C4 C5 141.66(13) . . . . ? 
O3 S1 C4 C5 13.49(14) . . . . ? 
N2 S1 C4 C5 -102.78(13) . . . . ? 
O4 S1 C4 C3 -32.01(14) . . . . ? 
O3 S1 C4 C3 -160.17(12) . . . . ? 
N2 S1 C4 C3 83.56(13) . . . . ? 
C3 C4 C5 C6 2.2(2) . . . . ? 
S1 C4 C5 C6 -171.37(12) . . . . ? 
C2 C1 C6 C5 -1.6(2) . . . . ? 
N1 C1 C6 C5 176.55(14) . . . . ? 
C4 C5 C6 C1 -0.7(2) . . . . ? 
C10 O5 C7 N2 -34.32(14) . . . . ? 
C10 O5 C7 C8 -153.63(13) . . . . ? 
C10 O5 C7 C9 82.99(15) . . . . ? 
C11 N2 C7 O5 11.02(14) . . . . ? 
S1 N2 C7 O5 -170.28(10) . . . . ? 
C11 N2 C7 C8 126.26(15) . . . . ? 
S1 N2 C7 C8 -55.04(18) . . . . ? 
C11 N2 C7 C9 -105.82(14) . . . . ? 
S1 N2 C7 C9 72.88(16) . . . . ? 
C7 O5 C10 C11 45.54(15) . . . . ? 
C7 N2 C11 C12 -105.52(14) . . . . ? 
S1 N2 C11 C12 75.73(16) . . . . ? 
C7 N2 C11 C10 14.26(15) . . . . ? 
S1 N2 C11 C10 -164.49(11) . . . . ? 
O5 C10 C11 N2 -34.66(14) . . . . ? 
O5 C10 C11 C12 83.68(16) . . . . ? 
N2 C11 C12 C13 -127.17(16) . . . . ? 
C10 C11 C12 C13 122.33(17) . . . . ? 
C11 C12 C13 C14 176.15(14) . . . . ? 
C12 C13 C14 C15 146.77(16) . . . . ? 
C12 C13 C14 C16 -141.93(16) . . . . ? 
C13 C14 C15 C17 -5.0(2) . . . . ? 
C16 C14 C15 C17 -111.07(17) . . . . ? 
C13 C14 C15 C16 106.05(17) . . . . ? 
C17 C15 C16 C23 -134.51(15) . . . . ? 
C14 C15 C16 C23 108.85(16) . . . . ? 
C17 C15 C16 C14 116.64(16) . . . . ? 
C13 C14 C16 C23 131.91(15) . . . . ? 
C15 C14 C16 C23 -112.34(16) . . . . ? 
C13 C14 C16 C15 -115.75(16) . . . . ? 
C16 C15 C17 C18 -108.70(18) . . . . ? 
C14 C15 C17 C18 -32.8(2) . . . . ? 
C16 C15 C17 C22 77.70(19) . . . . ? 
C14 C15 C17 C22 153.64(15) . . . . ? 
C22 C17 C18 C19 1.7(2) . . . . ? 
C15 C17 C18 C19 -171.82(15) . . . . ? 
C17 C18 C19 C20 -0.8(3) . . . . ? 
C18 C19 C20 C21 -0.5(3) . . . . ? 
C19 C20 C21 C22 0.9(2) . . . . ? 
C20 C21 C22 C17 0.1(2) . . . . ? 
C18 C17 C22 C21 -1.4(2) . . . . ? 
C15 C17 C22 C21 172.53(14) . . . . ? 
C15 C16 C23 C24 160.11(14) . . . . ? 
C14 C16 C23 C24 -128.57(15) . . . . ? 
C15 C16 C23 C28 -21.2(2) . . . . ? 
C14 C16 C23 C28 50.1(2) . . . . ? 
C28 C23 C24 C25 0.8(2) . . . . ? 
C16 C23 C24 C25 179.57(14) . . . . ? 
C23 C24 C25 C26 -0.2(2) . . . . ? 
C24 C25 C26 C27 -0.1(2) . . . . ? 
C25 C26 C27 C28 -0.3(2) . . . . ? 
C26 C27 C28 C23 0.8(2) . . . . ? 
C24 C23 C28 C27 -1.1(2) . . . . ? 
C16 C23 C28 C27 -179.83(14) . . . . ? 
  
_diffrn_measured_fraction_theta_max    0.995 
_diffrn_reflns_theta_full              67.00 
_diffrn_measured_fraction_theta_full   0.999 
_refine_diff_density_max    0.356 
_refine_diff_density_min   -0.400 
_refine_diff_density_rms    0.042 
 
# File processed with modiCIFer (v.3-27-2007). I.A.Guzei, UW-Madison.
